# Supplementary material
Source: PubMed Central journal article supplement (PMC4067148)
Supplement: bi5000838_si_001.pdf [file bi5000838_si_001.pdf]

## Supplementary materials

Figure S1. CD spectra of AcrB mutants

Figure S2. SDS denaturation profiles of AcrB mutants.

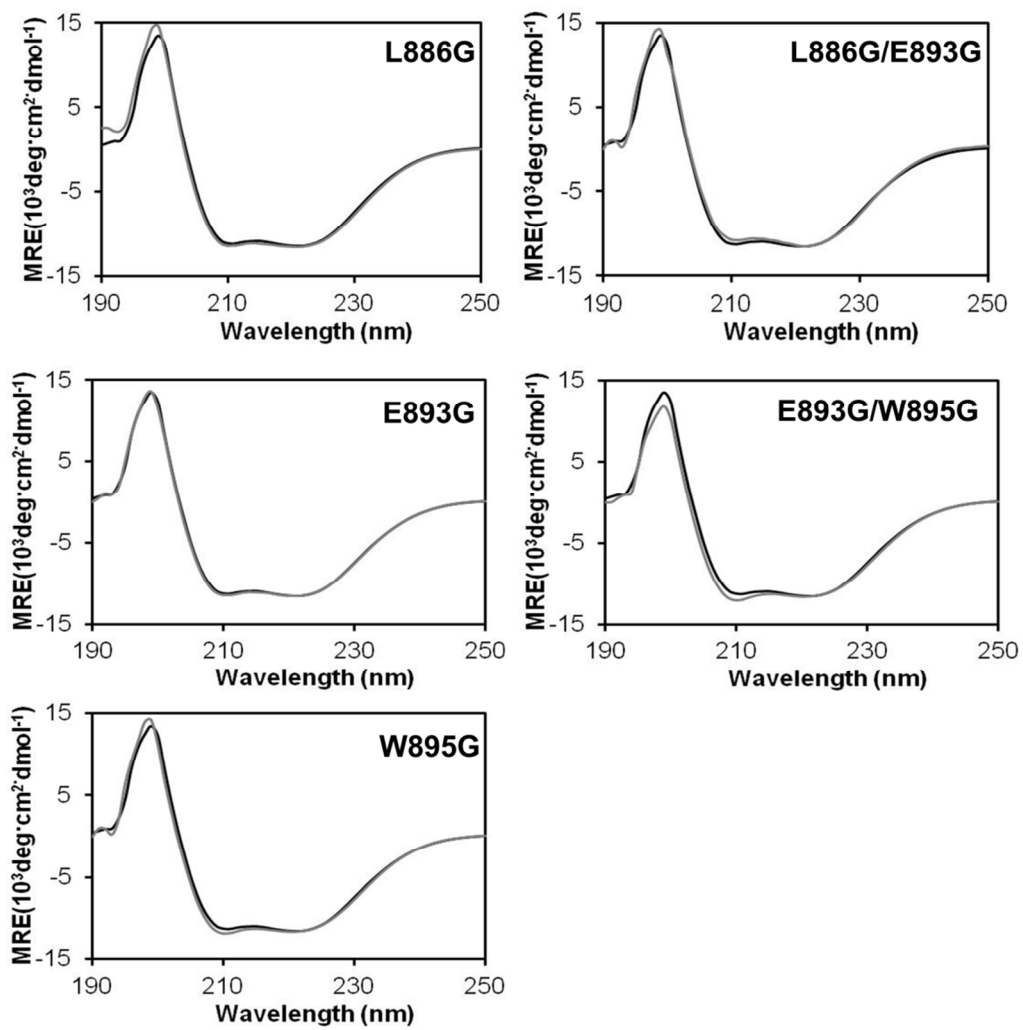

Figure S1. CD spectra of AcrB mutants (grey) compared with the spectrum of wild type AcrB.

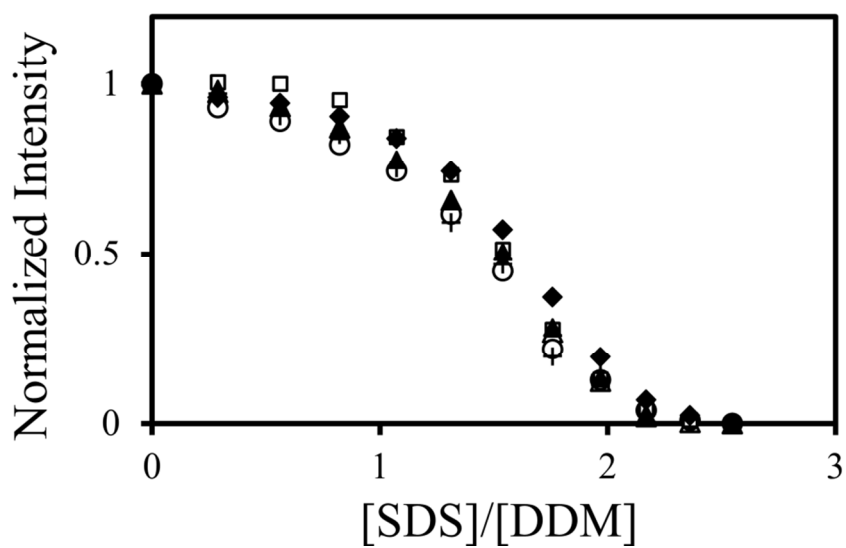

Figure S2. SDS unfolding profiles of wild type AcrB (black diamonds), AcrB<sub>L886G</sub> (Grey squares), AcrB<sub>E893G</sub> (open triangles), AcrB<sub>W895G</sub> (white circles), AcrB<sub>L886G/E893G</sub> (black crosses), and AcrB<sub>E893G/W895G</sub> (white squares).
